# Supplementary material for: Synthesis, characterization, and green to orange luminescence properties of copper(i) complexes with 3-bdppmapy ligand-containing phenanthroline and its derivatives
Source: Royal Society of Chemistry journal article supplement (doi:10.1039/d4ce01324g), 2025-01-01
Supplement: d4ce01324g1.pdf [file d4ce01324g1.pdf]

**Synthesis, Characterization, and Green to Orange Luminescence Properties of Copper(I)  
Complexes with 3-bdppmapy Ligand-Containing Phenanthroline and Its Derivatives**

Wen-Long Mou,<sup>†a</sup> Si-Jie Fan,<sup>†a</sup> Ying-Long Wang,<sup>a</sup> Guo Wang,<sup>a</sup> Fu-Zhen Hu,<sup>a</sup> Gui-Xiong Guo,<sup>a</sup> Hong-  
Liang Han,<sup>a</sup> Xiu-Lan Xin,<sup>b</sup> Jian-Ming Liu,<sup>c</sup> Yu-Ping Yang,<sup>d</sup> Zhong-Feng Li,<sup>a\*</sup> and Qiong-Hua Jin<sup>\*aefg</sup>

## **Caption of Figure**

**Fig. S1 The IR spectrum for complex 1**

**Fig. S2 The IR spectrum for complex 2**

**Fig. S3 The IR spectrum for complex 3**

**Fig. S4 The IR spectrum for complex 4**

**Fig. S5 The IR spectrum for complex 5**

**Fig. S6 The IR spectrum for complex 6**

**Fig. S7 The IR spectrum for complex 7**

**Fig. S8 The IR spectrum for complex 8**

**Fig. S9 The <sup>1</sup>H NMR spectrum for complex 1**

**Fig. S10 The <sup>1</sup>H NMR spectrum for complex 2**

**Fig. S11 The <sup>1</sup>H NMR spectrum for complex 3**

**Fig. S12 The <sup>1</sup>H NMR spectrum for complex 4**

**Fig. S13 The <sup>1</sup>H NMR spectrum for complex 5**

**Fig. S14 The <sup>1</sup>H NMR spectrum for complex 6**

**Fig. S15 The <sup>1</sup>H NMR spectrum for complex 7**

**Fig. S16 The <sup>1</sup>H NMR spectrum for complex 8**

**Fig. S17 The PXRD spectrum for complexes 1-8**

**Table. S1 Selected bond lengths (Å) and angles (°) for complexes 1-8.**

**Table. S2 Intermolecular weak interactions for complexes 1-8.**

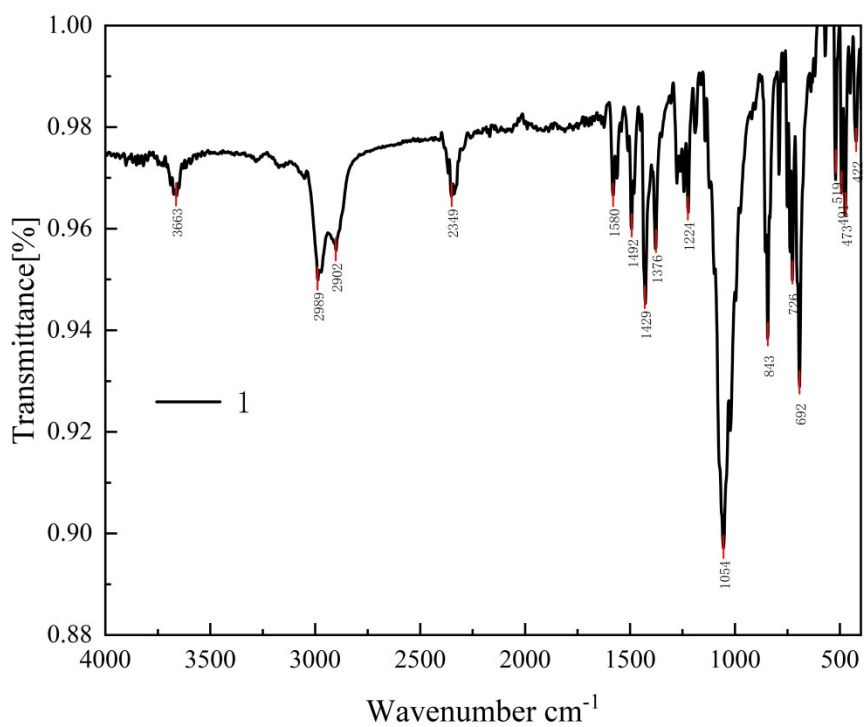

Fig. S1 The IR spectra for complex 1

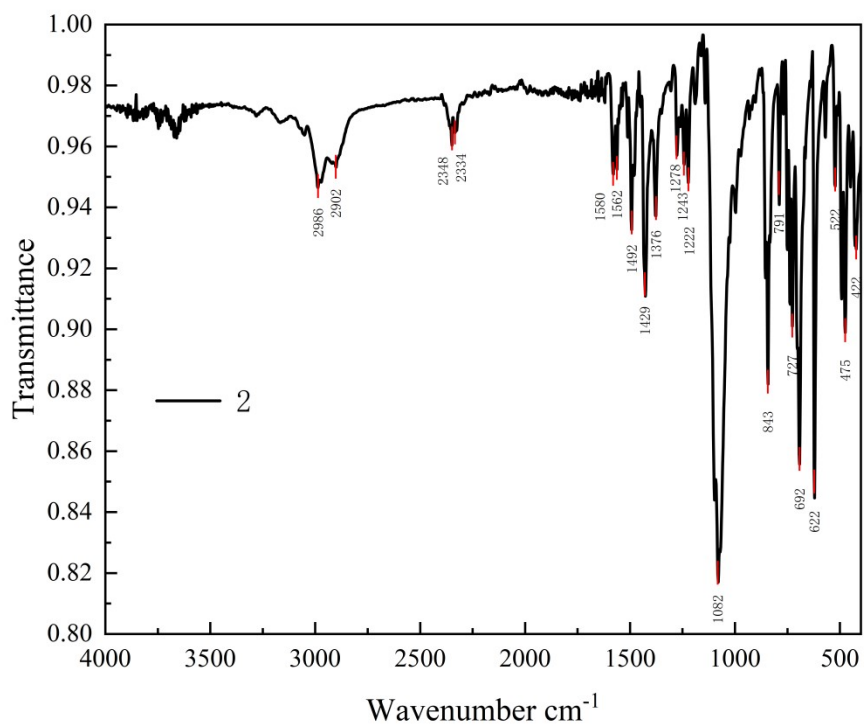

Fig. S2 The IR spectra for complex 2

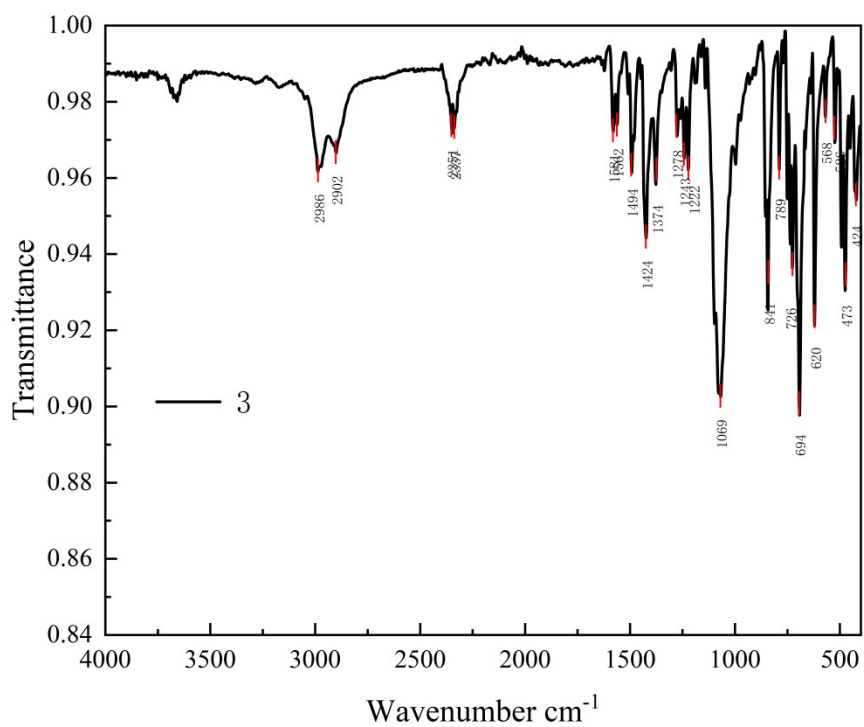

Fig. S3 The IR spectra for complex 3

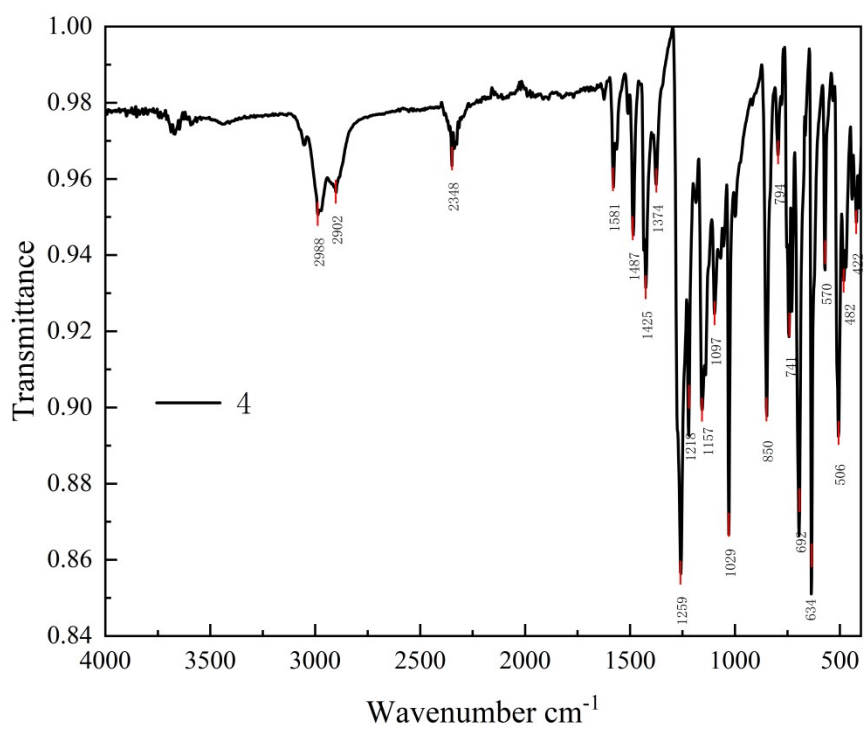

Fig. S4 The IR spectra for complex 4

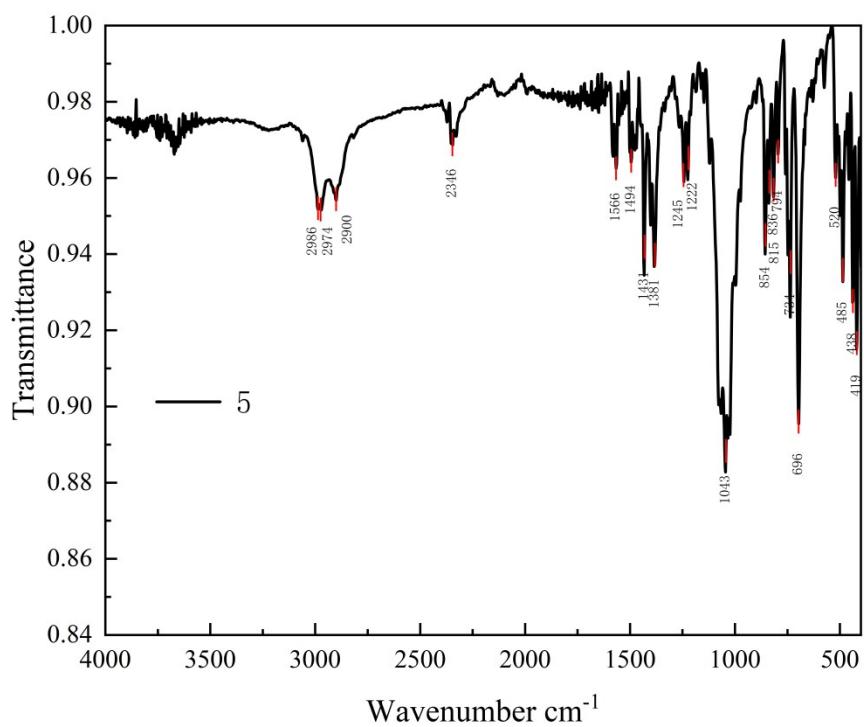

Fig. S5 The IR spectra for complex 5

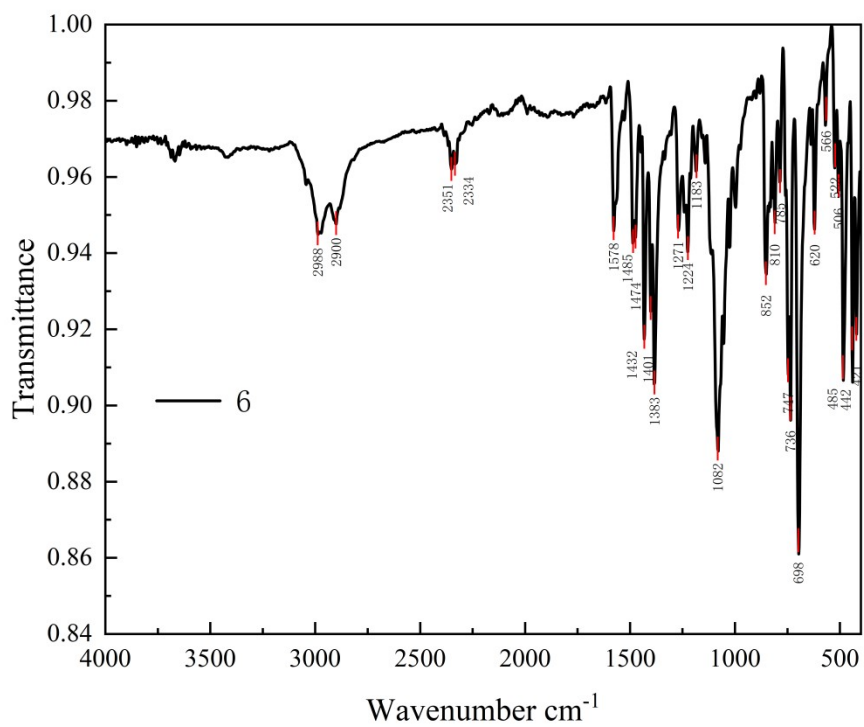

Fig. S6 The IR spectra for complex 6

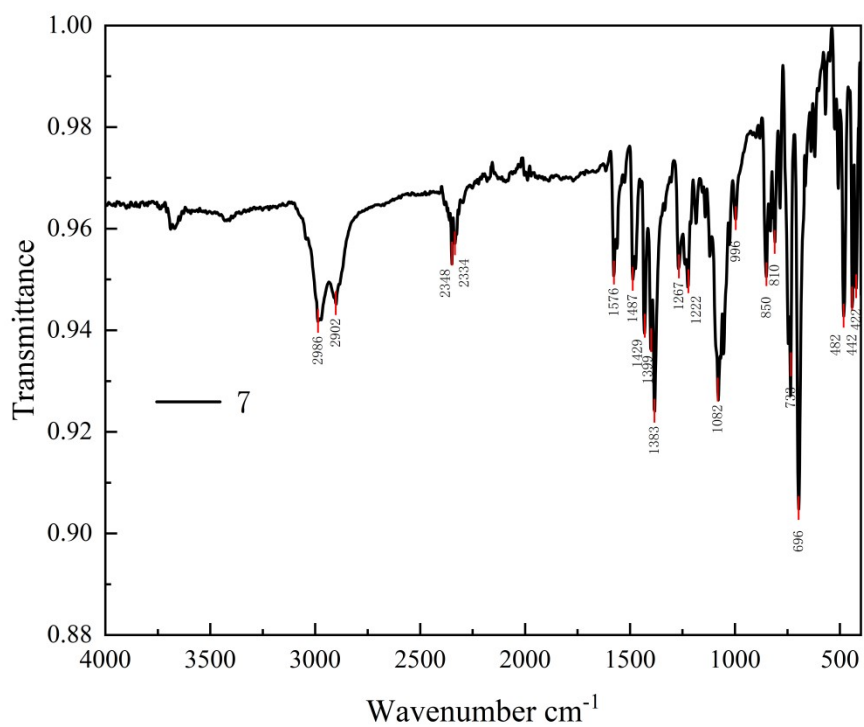

Fig. S7 The IR spectra for complex 7

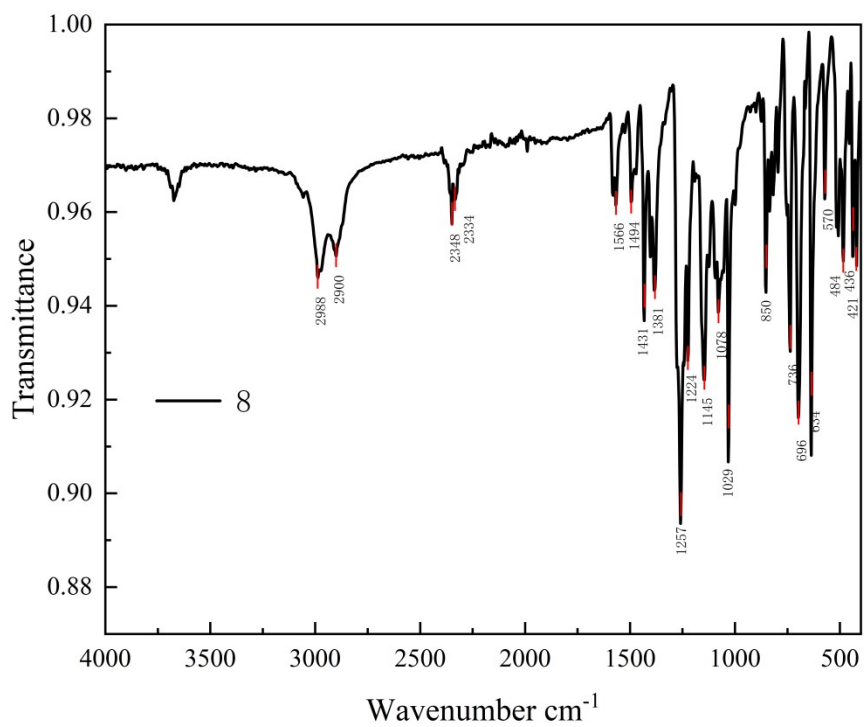

Fig. S8 The IR spectra for complex 8

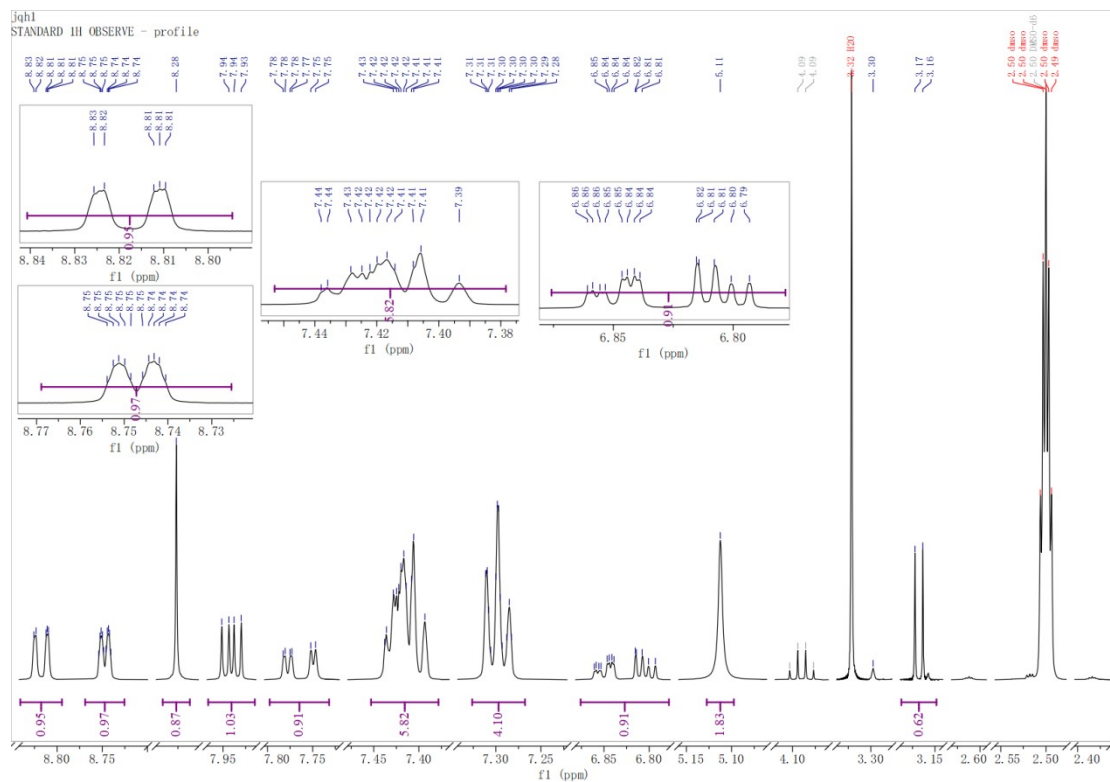

Fig. S9 The  $^1\text{H}$  NMR spectra for complex **1**

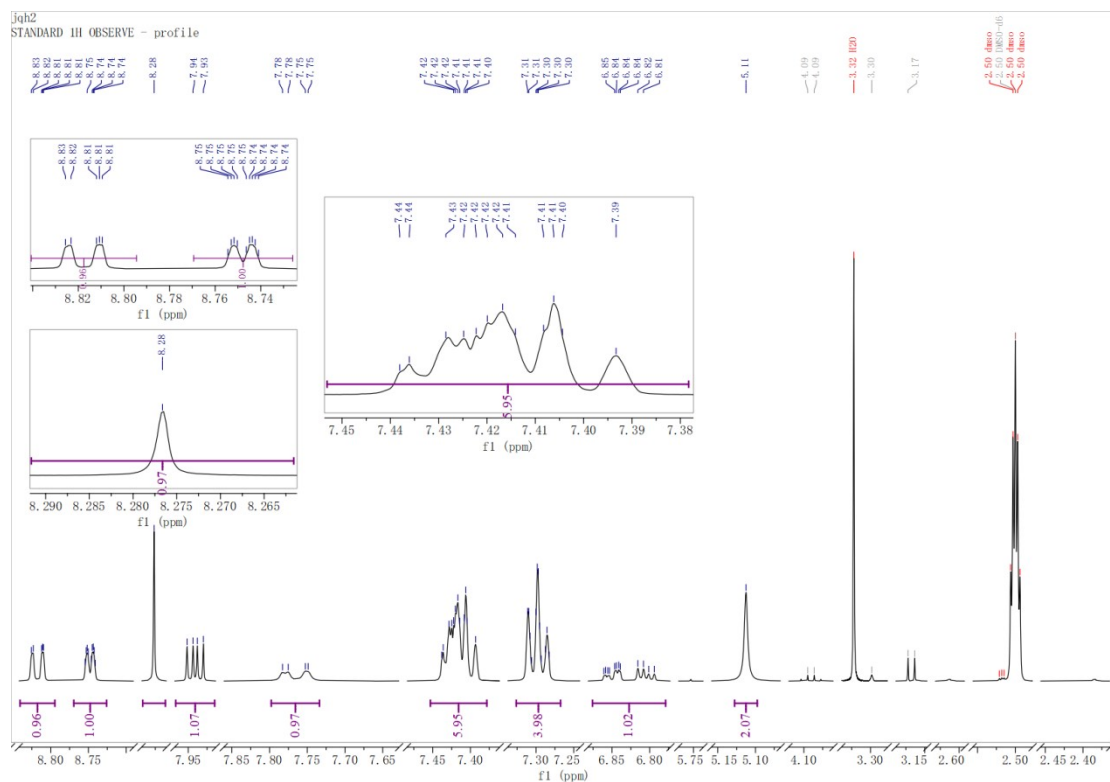

Fig. S10 The  $^1\text{H}$  NMR spectra for complex **2**

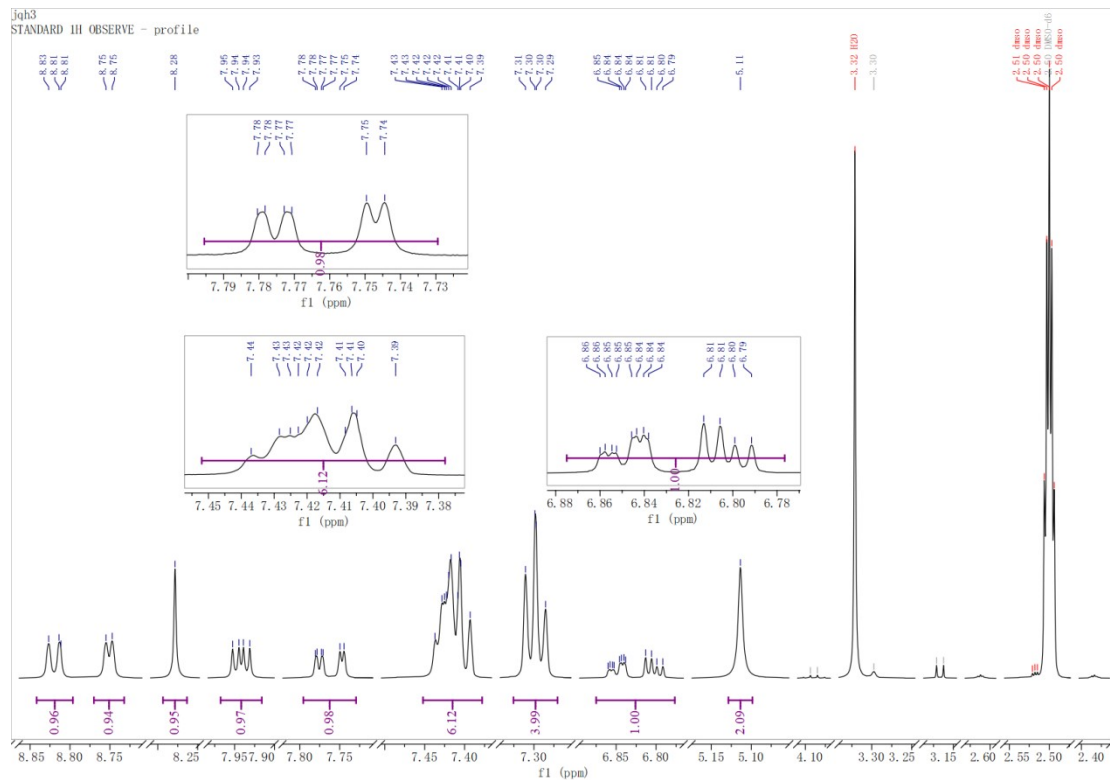

Fig. S11 The <sup>1</sup>H NMR spectra for complex 3

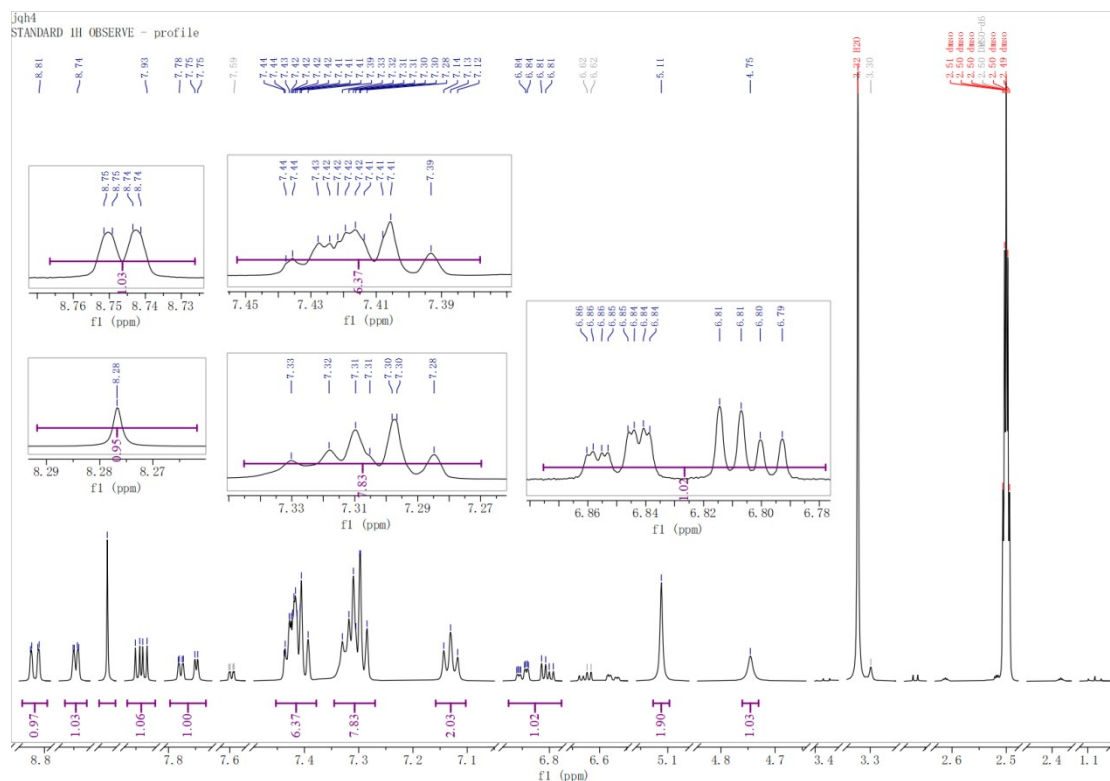

Fig. S12 The <sup>1</sup>H NMR spectra for complex 4



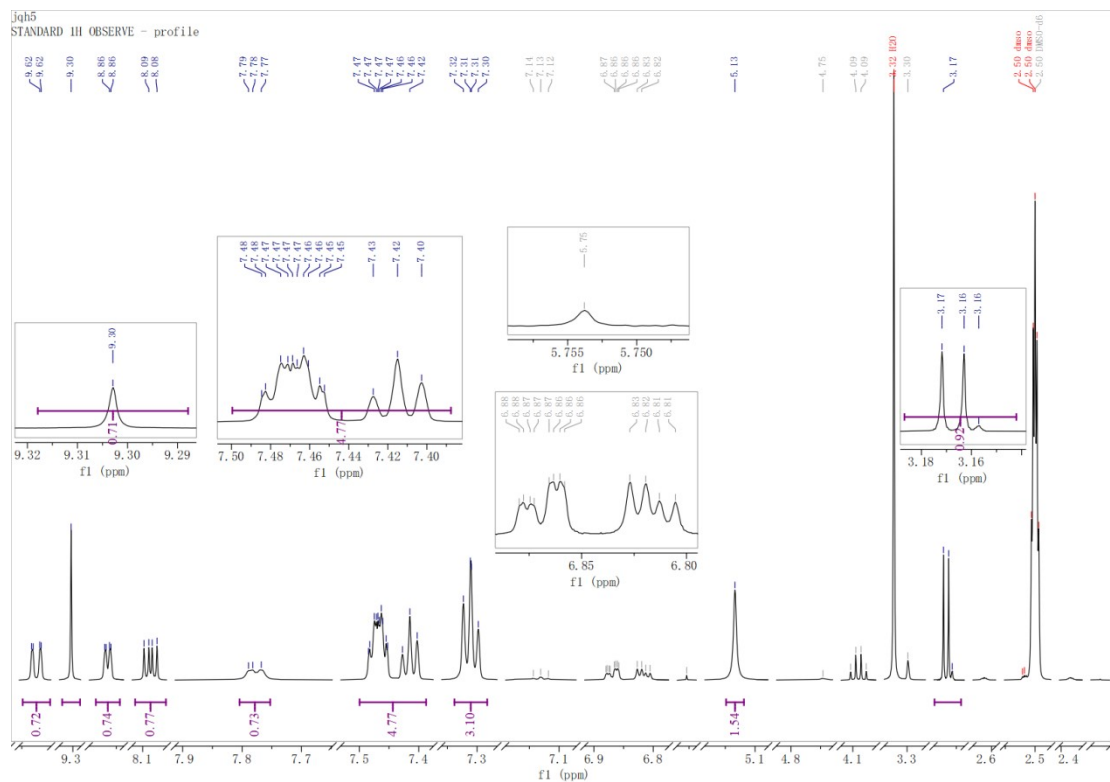

Fig. S13 The  $^1\text{H}$  NMR spectra for complex **5**

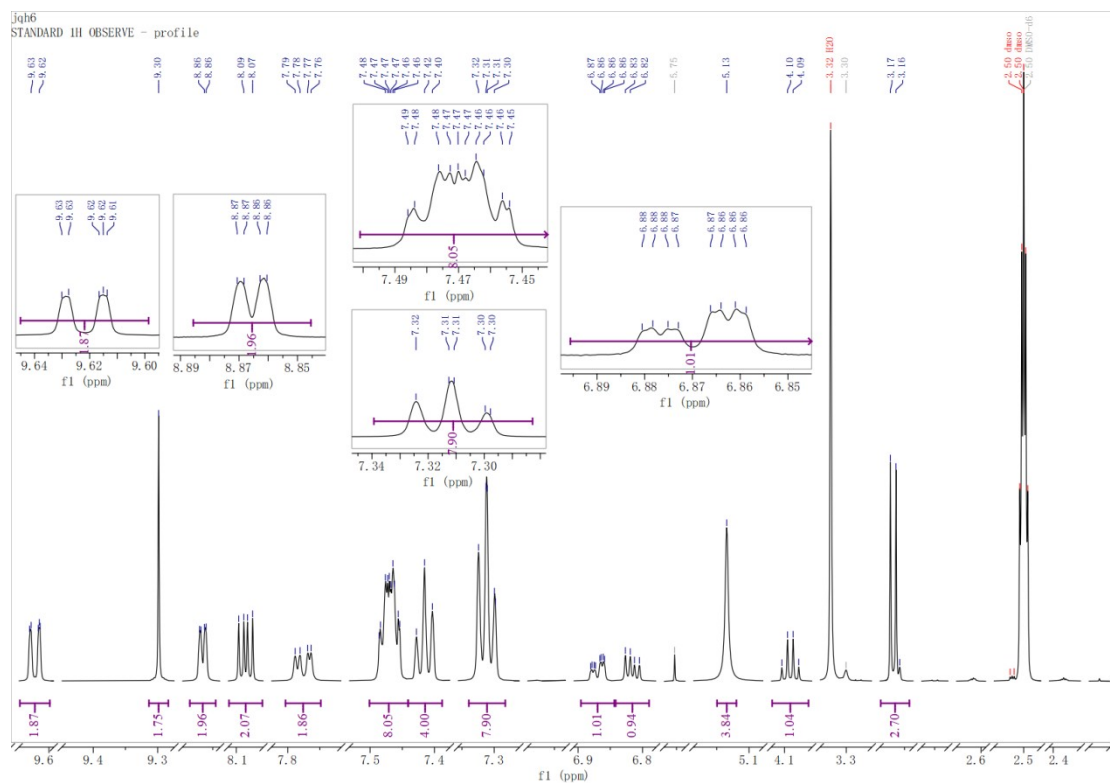

Fig. S14 The  $^1\text{H}$  NMR spectra for complex **6**

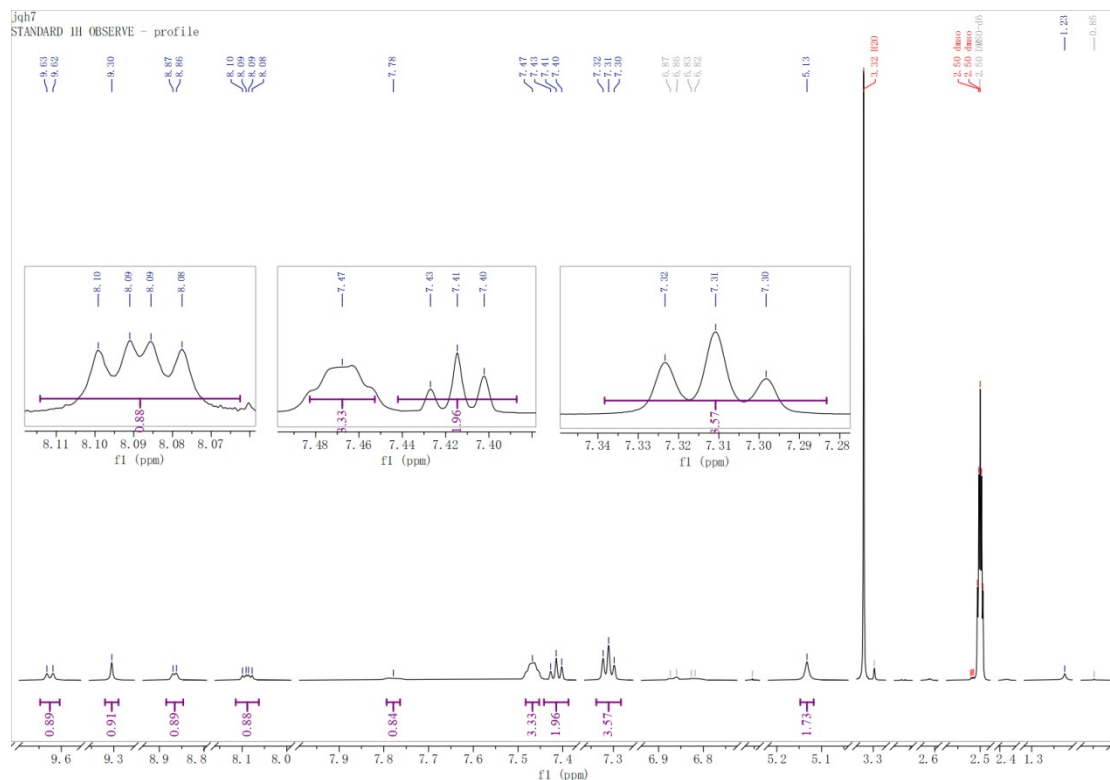

Fig. S15 The <sup>1</sup>H NMR spectra for complex 7

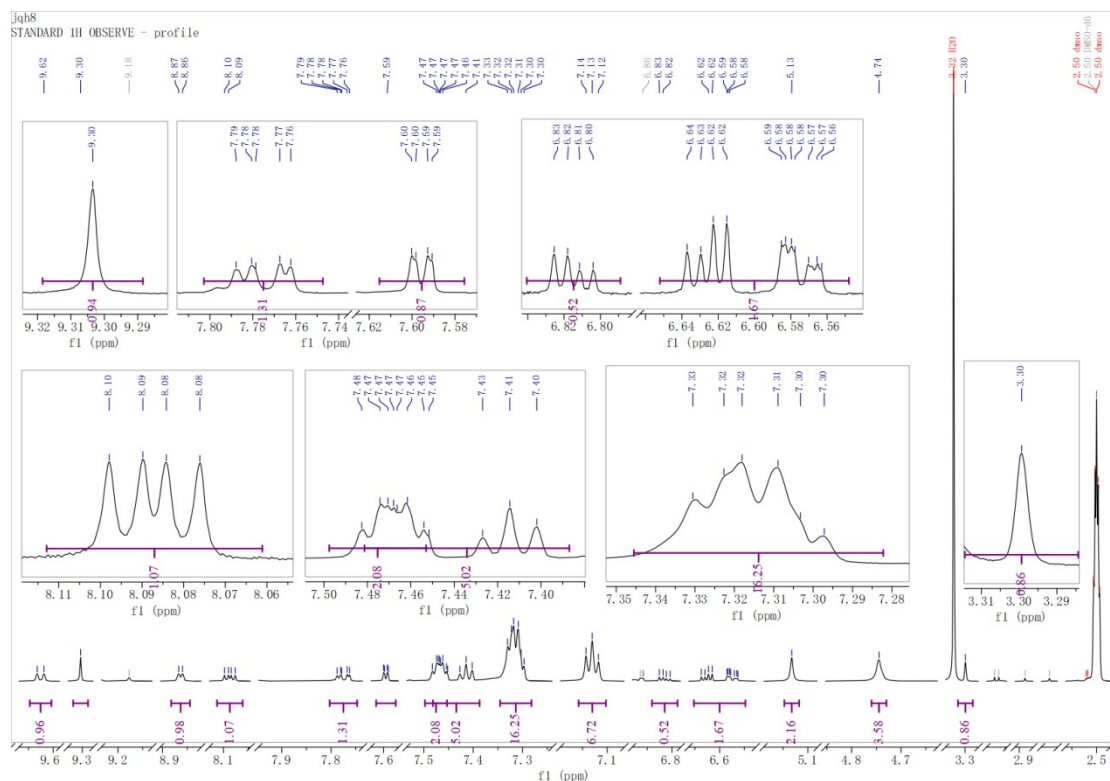

Fig. S16 The <sup>1</sup>H NMR spectra for complex 8

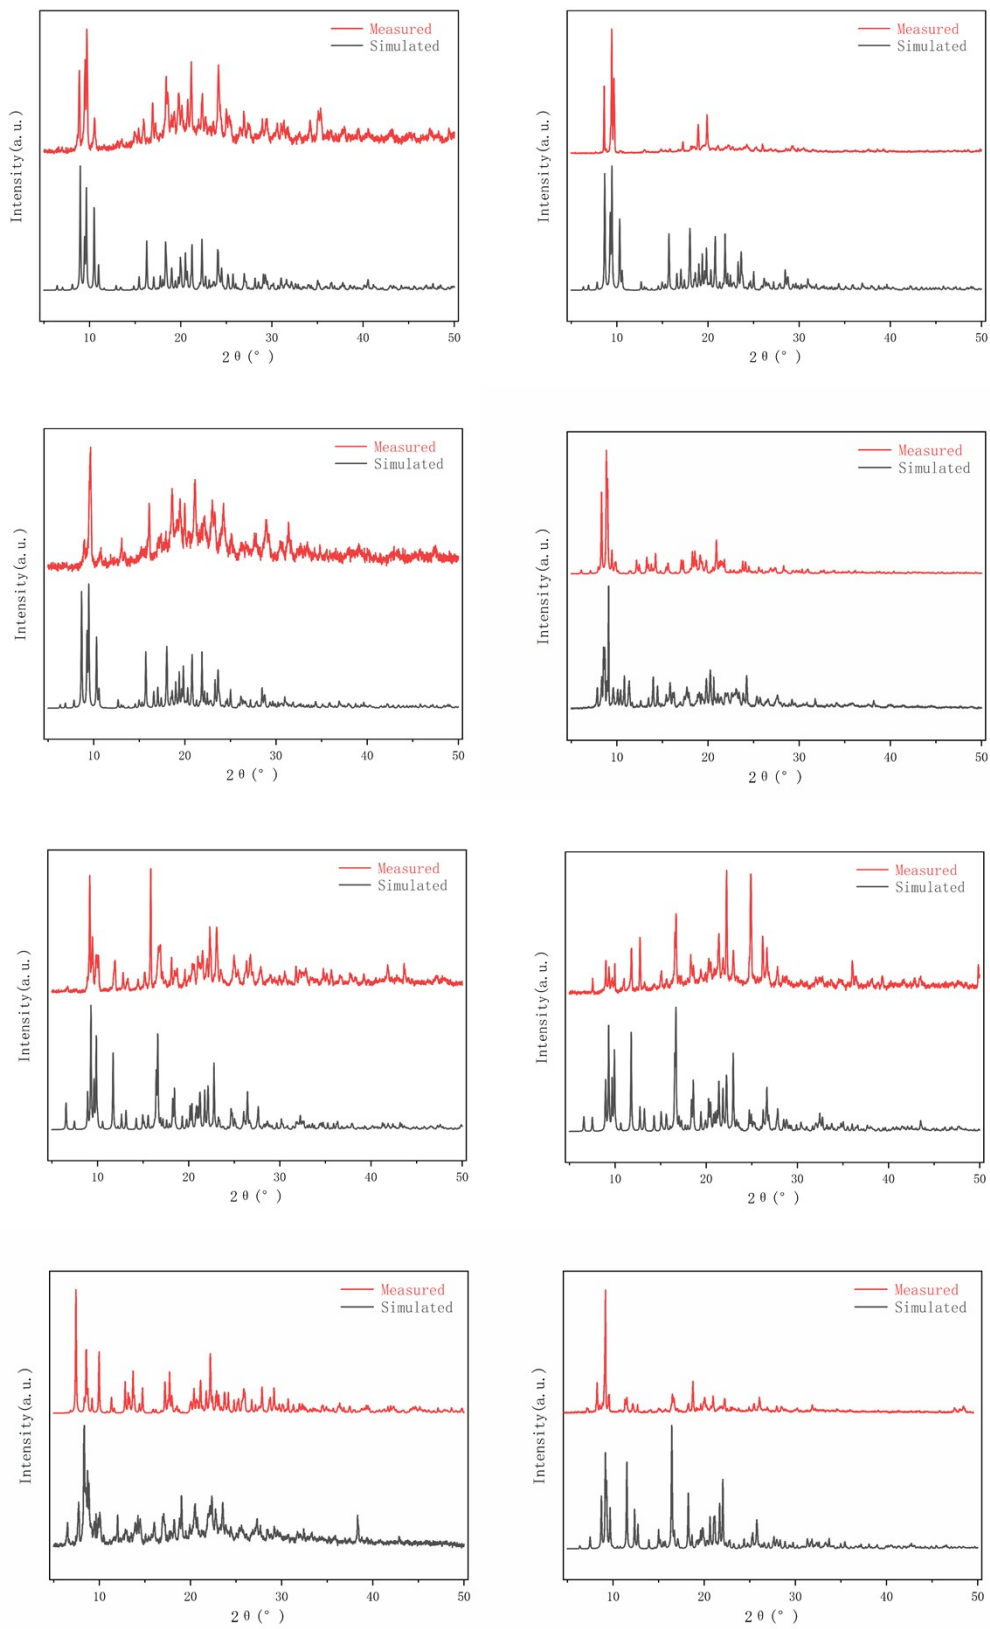

Fig. S17 The PXR D spectra for complexes **1-8**

Table. S1 Selected bond lengths (Å) and angles (°) for complexes 1-8.

| <b>1</b>   |            |                  |             |
|------------|------------|------------------|-------------|
| Cu(1)-P(1) | 2.2431(7)  | P(1)-Cu(1)-P(2)  | 106.05(3)   |
| Cu(1)-P(2) | 2.2431(7)  | P(1)-Cu(1)-N(3)  | 112.44(6)   |
| Cu(1)-N(3) | 2.072(2)   | P(1)-Cu(1)-N(4)  | 130.81(6)   |
| Cu(1)-N(4) | 2.048(2)   | P(2)-Cu(1)- N(3) | 109.04(6)   |
|            |            | P(2)-Cu(1)-N(4)  | 113.59(6)   |
|            |            | N(3)-Cu(1)-N(4)  | 81.20(8)    |
| <b>2</b>   |            |                  |             |
| Cu(1)-P(1) | 2.2726(17) | P(1)-Cu(1)-P(2)  | 105.59(6)   |
| Cu(1)-P(2) | 2.2700(18) | P(1)-Cu(1)-N(3)  | 113.08(15)  |
| Cu(1)-N(3) | 2.098(5)   | P(1)-Cu(1)-N(4)  | 130.76(15)  |
| Cu(1)-N(4) | 2.078(5)   | P(2)-Cu(1)- N(3) | 108.73(15)  |
|            |            | P(2)-Cu(1)-N(4)  | 114.03(14)  |
|            |            | N(3)-Cu(1)-N(4)  | 81.0(2)     |
| <b>3</b>   |            |                  |             |
| Cu(1)-P(1) | 2.2558(17) | P(1)-Cu(1)-P(2)  | 105.47(6)   |
| Cu(1)-P(2) | 2.2608(16) | P(1)-Cu(1)-N(2)  | 116.09(14)  |
| Cu(1)-N(2) | 2.078(5)   | P(2)-Cu(1)-N(2)  | 128.67(14)  |
| Cu(1)-N(3) | 2.101(5)   | P(1)-Cu(1)- N(3) | 107.30(14)  |
|            |            | P(2)-Cu(1)-N(3)  | 114.28(14)  |
|            |            | N(2)-Cu(1)-N(3)  | 81.39(19)   |
| <b>4</b>   |            |                  |             |
| Cu(1)-P(1) | 2.205(3)   | P(1)-Cu(1)-P(2)  | 104.99(11)  |
| Cu(1)-P(2) | 2.225(3)   | P(1)-Cu(1)-N(3)  | 127.4(2)    |
| Cu(1)-N(3) | 2.020(7)   | P(1)-Cu(1)-N(4)  | 116.6(3)    |
| Cu(1)-N(4) | 2.020(8)   | P(2)-Cu(1)- N(3) | 115.9(2)    |
|            |            | P(2)-Cu(1)-N(4)  | 107.9(2)    |
|            |            | N(3)-Cu(1)-N(4)  | 81.6(3)     |
| <b>5</b>   |            |                  |             |
| Cu(1)-P(1) | 2.2627(9)  | P(1)-Cu(1)-P(2)  | 106.53(3)   |
| Cu(1)-P(2) | 2.2518(9)  | P(1)-Cu(1)-N(3)  | 110.75(7)   |
| Cu(1)-N(3) | 2.086(2)   | P(1)-Cu(1)-N(4)  | 115.41(7)   |
| Cu(1)-N(4) | 2.077(2)   | P(2)-Cu(1)- N(3) | 112.28(7)   |
|            |            | P(2)-Cu(1)-N(4)  | 127.91(7)   |
|            |            | N(3)-Cu(1)-N(4)  | 80.72(9)    |
| <b>6</b>   |            |                  |             |
| Cu(1)-P(1) | 2.2322(5)  | P(1)-Cu(1)-P(2)  | 106.518(18) |
| Cu(1)-P(2) | 2.2470(5)  | P(1)-Cu(1)-N(1)  | 112.59(4)   |

|            |            |                  |            |
|------------|------------|------------------|------------|
| Cu(1)-N(1) | 2.0746(14) | P(1)-Cu(1)-N(2)  | 128.27(4)  |
| Cu(1)-N(2) | 2.0616(14) | P(2)-Cu(1)- N(1) | 109.87(4)  |
|            |            | P(2)-Cu(1)-N(2)  | 115.37(4)  |
|            |            | N(1)-Cu(1)-N(2)  | 80.73(5)   |
| <b>7</b>   |            |                  |            |
| Cu(1)-P(1) | 2.2427(6)  | P(1)-Cu(1)-P(2)  | 105.62(2)  |
| Cu(1)-P(2) | 2.2332(6)  | P(1)-Cu(1)-N(3)  | 107.30(6)  |
| Cu(1)-N(3) | 2.0704(19) | P(1)-Cu(1)-N(4)  | 119.26(5)  |
| Cu(1)-N(4) | 2.0504(18) | P(2)-Cu(1)- N(3) | 116.26(6)  |
|            |            | P(2)-Cu(1)-N(4)  | 124.62(5)  |
|            |            | N(3)-Cu(1)-N(4)  | 80.78(7)   |
| <b>8</b>   |            |                  |            |
| Cu(1)-P(1) | 2.2582(11) | P(1)-Cu(1)-P(2)  | 106.72(4)  |
| Cu(1)-P(2) | 2.2393(12) | P(1)-Cu(1)-N(3)  | 117.73(9)  |
| Cu(1)-N(3) | 2.052(3)   | P(1)-Cu(1)-N(4)  | 108.14(9)  |
| Cu(1)-N(4) | 2.085(3)   | P(2)-Cu(1)- N(3) | 126.87(9)  |
|            |            | P(2)-Cu(1)-N(4)  | 112.77(10) |
|            |            | N(3)-Cu(1)-N(4)  | 80.36(12)  |

Table. S2 Intermolecular weak interactions for complexes **1-8**.

| Cg(i)/C-H→Cg(i)/(A)    | Cg                                                    | Symmetry code | Cg(A)/H ...Cg(B)/Å |
|------------------------|-------------------------------------------------------|---------------|--------------------|
| C3-H3→Cg(7)            | Cg(7):C13-C14-C15-C16-C17-C18                         | -x, 1-y, 2-z  | 2.99               |
| C23-H23→Cg(10)         | Cg(10):C31-C32-C33-C34-C35-C36                        | -x, -y, 2-z   | 2.87               |
| C42-H42C→Cg(4)         | Cg(4):N3-C7-C8-C9-C10-C11                             | x, y, -1+z    | 2.66               |
| Cg(5) →Cg(6)           | Cg(5):N4-C1-C2-C3-C4-C12<br>Cg(6):C4-C5-C6-C7-C11-C12 | -x, 1-y, 2-z  | 3.45               |
| <b>1</b> Cg(6) →Cg(6)  | Cg(6):C4-C5-C6-C7-C11-C12                             | -x, 1-y, 2-z  | 3.71               |
| O1-H1A→N1              | /                                                     | -x, 1-y, 1-z  | 1.99               |
| C1-H1→F4               | /                                                     | x, y, 1+z     | 2.47               |
| C8-H8→F3               | /                                                     | 1-x, 1-y, 1-z | 2.43               |
| C10-H10→F2             | /                                                     | 1-x, 1-y, 1-z | 2.31               |
| C29-H29→F1             | /                                                     | x, y, 1+z     | 2.52               |
| C43-H43A→F2            | /                                                     | 1-x, 1-y, 1-z | 2.55               |
| C44-H44B→F2            | /                                                     | 1-x, 1-y, 1-z | 2.44               |
| C28-H28→Cg(8)          | Cg(8):C20-C21-C22-C23-C24-C25                         | -x, -y, 1-z   | 2.91               |
| <b>2</b> C44-H44→Cg(4) | Cg(4):N3-C32-C33-C34-C35-C36                          | x,y,z         | 2.74               |
| Cg(5)→Cg(10)           | Cg(5):N4-C37-C38-C39-C40-C41                          | -x, 1-y, 1-z  | 3.54               |

|            |                                 |                                                                |                    |      |
|------------|---------------------------------|----------------------------------------------------------------|--------------------|------|
|            |                                 | Cg(10):C35-C36-C37-C38-C42-C43                                 |                    |      |
|            | Cg(10)→Cg(10)                   | Cg(10):C35-C36-C37-C38-C42-C43                                 | -x, 1-y, 1-z       | 3.81 |
|            | O5-H5A→N2                       | /                                                              | x, y, 1+z          | 2.09 |
|            | C2-H2A→O1                       | /                                                              | /                  | 2.50 |
|            | C32-H32→O1                      | /                                                              | /                  | 2.44 |
|            | C34-H34→O4                      | /                                                              | 1-x, 1-y, 1-z      | 2.50 |
|            | C19-H19→Cg(6)                   | Cg(6):C9-C10-C11-C12-C13-C14                                   | -x, -y, 1-z        | 2.87 |
| <b>3</b>   | Cg(3)→Cg(10)                    | Cg(3):N2-C33-C34-C35-C36-C37<br>Cg(10):C36-C37-C38-C39-C43-C44 | -x, 1-y, -z        | 3.49 |
|            | Cg(10)→Cg(10)                   | Cg(10):C36-C37-C38-C39-C43-C44                                 | -x, 1-y, -z        | 3.89 |
|            | No Classic Hydrogen Bonds Found |                                                                |                    |      |
|            | C11-H11→Cg(9)                   | Cg(9):C26-C27-C28-C29-C30-C31                                  | 1-x, -1/2+y, 1/2-z | 2.94 |
|            | C28-H28→Cg(21)                  | Cg(21):C63-C64-C65-C66-C67-C68                                 | x, y, z            | 2.60 |
|            | C34-H34→Cg(7)                   | Cg(7):C14-C15-C16-C17-C18-C19                                  | 1-x, -y, 1-z       | 2.92 |
|            | C60-H60→Cg(22)                  | Cg(22):C69-C70-C71-C72-C73-C74                                 | -x, 1/2+y, 1/2-z   | 2.85 |
|            | C71-H71→Cg(8)                   | Cg(8):C20-C21-C22-C23-C24-C25                                  | x, y, z            | 2.74 |
|            | C85-H85→Cg(19)                  | Cg(19):C51-C52-C53-C54-C55-C56                                 | -x, -y, -z         | 2.56 |
| <b>4</b>   | Cg(3)→Cg(3)                     | Cg(3): N2-C3-C4-C5-C7-C89                                      | 1-x, 1/2+y, 1/2-z  | 3.61 |
|            | Cg(4)→Cg(4)                     | Cg(4):N3-C32-C33-C34-C35-C36                                   | 1-x, -y, 1-z       | 3.60 |
|            | Cg(4)→Cg(10)                    | Cg(4):N3-C32-C33-C34-C35-C36<br>Cg(10):C35-C36-C37-C38-C42-C43 | 1-x, -y, 1-z       | 3.64 |
|            | Cg(23)→Cg(23)                   | Cg(23):C78-C79-C80-C81-C85-C86                                 | -x, -y, -z         | 3.43 |
|            | C1-H1A→O2                       | /                                                              | /                  | 2.54 |
| C7-H7→O3   | /                               | 1-x, -y, -z                                                    | 2.35               |      |
| C19-H19→O2 | /                               | /                                                              | 2.22               |      |
| C32-H32→O1 | /                               | 1-x, -1/2+y,                                                   | 2.27               |      |

|   |                |                                                                     |                      |      |
|---|----------------|---------------------------------------------------------------------|----------------------|------|
|   | C41-H41→O2     | /                                                                   | 1/2-z                | 2.36 |
|   | C45-H45A→O4    | /                                                                   | -x, -1/2+y,<br>1/2-z | 2.42 |
|   | C49-H49→O4     | /                                                                   | x, 1/2-y,<br>1/2+z   | 2.54 |
|   | C49-H49→O5     | /                                                                   | x, 1/2-y,<br>1/2+z   | 2.34 |
|   | C65-H65→O6     | /                                                                   | /                    | 2.40 |
|   | C75-H75→O5     | /                                                                   | /                    | 2.45 |
|   | C84-H84→O4     | /                                                                   | -x, -1/2+y,<br>1/2-z | 2.44 |
|   | C3-H3→Cg(9)    | Cg(9):C22-C23-C24-C25-C26-<br>C27                                   | 1-x, 1-y, -z         | 2.87 |
|   | C38-H38→Cg(3)  | Cg(3):N1-C2-C3-N2-C4-C5                                             | 1-x, 2-y, -z         | 2.80 |
|   | C43-H43→Cg(11) | Cg(11):C34-C35-C36-C37-C38-<br>C39                                  | x, y, z              | 2.89 |
| 5 | Cg(3)→Cg(5)    | Cg(3):N1-C2-C3-N2-C4-C5<br>Cg(5):N4-C8-C9-C12-C13-C15               | 1-x, 1-y, -z         | 3.82 |
|   | Cg(6)→Cg(6)    | Cg(6):N6-C41-C42-C43-C44-<br>C45                                    | -x, 2-y, 1-z         | 3.72 |
|   | O1-H1→N6       | /                                                                   | -x, 1-y, 1-z         | 2.05 |
|   | C13-H13→F1     | /                                                                   | 1-x, 1-y, 1-z        | 2.47 |
|   | C21-H21→F2     | /                                                                   | -x, 1-y, 1-z         | 2.47 |
|   | C9-H9→Cg(5)    | Cg(5):N3-C42-C43-N4-C45-<br>C46                                     | 1-x, 1-y, 1-z        | 2.76 |
|   | C15-H15→Cg(8)  | Cg(8):C7-C8-C9-C10-C11-C12                                          | x, y, z              | 2.83 |
|   | C45-H45→Cg(9)  | Cg(9):C20-C21-C22-C23-C24-<br>C25                                   | 1-x, -y, 1-z         | 2.85 |
| 6 | Cg(4)→Cg(5)    | Cg(4):N2-C37-C38-C39-C40-<br>C41<br>Cg(5):N3-C42-C43-N4-C45-<br>C46 | 1-x, -y, 1-z         | 3.80 |
|   | Cg(6)→Cg(6)    | Cg(6):N6-C14-C15-C16-C17-<br>C18                                    | -x, 1-y, 2-z         | 3.68 |
|   | O47-H47→N6     | /                                                                   | 1+x, y, -1+z         | 2.00 |
|   | C11-H11→O4     | /                                                                   | 1-x, 1-y, 1-z        | 2.56 |
|   | C23-H23→N3     | /                                                                   | x, y, 1+z            | 2.61 |
|   | C27-H27→O3     | /                                                                   | -x, 1-y, 1-z         | 2.52 |
|   | C39-H39→O2     | /                                                                   | 1-x, 1-y, 1-z        | 2.48 |
| 7 | C29-H29→Cg(10) | Cg(10):C34-C35-C36-C37-C38-<br>C39                                  | x, y, z              | 2.84 |
|   | Cg(3)→Cg(5)    | Cg(3):N1-C3-C4-N2-C47-C48<br>Cg(5):N4-C7-C8-C9-C10-C11              | 1-x, 1-y, 1-z        | 3.55 |

|             |                              |                        |      |
|-------------|------------------------------|------------------------|------|
|             | Cg(5):N4-C7-C8-C9-C10-C11    |                        |      |
| Cg(5)→Cg(6) | Cg(6):N6-C29-C30-C31-C32-C33 | $1/2-x, 1/2+y, 1/2-z$  | 3.98 |
| Cg(6)→Cg(8) | Cg(6):N6-C29-C30-C31-C32-C33 | $1/2-x, -1/2+y, 1/2-z$ | 3.51 |
|             | Cg(8): C3-C4-C5-C6-C7-C8     |                        |      |
| O1-H1→N6    | /                            | $1-x, 1-y, -z$         | 2.17 |
| O3-H3→I1    | /                            | /                      | 2.73 |
| C11-H11→O3  | /                            | /                      | 2.37 |
| C13-H13→O1  | /                            | $1/2-x, -1/2+y, 1/2-z$ | 2.52 |
| Cg(3)→Cg(3) | Cg(3): N2-C3-C4-C5-C6-C7     | $1-x, -y, -z$          | 3.69 |
| Cg(4)→Cg(6) | Cg(4):N3-C32-C33-C34-C35-C36 | $-x, 1-y, 1-z$         | 3.77 |
|             | Cg(6):N5-C42-C43-N6-C44-C45  |                        |      |
| O4-H4→N2    | /                            | $1-x, 1-y, -z$         | 1.97 |
| C6-H6→O2    | /                            | $1-x, -y, -z$          | 2.59 |
| C27-H27→O4  | /                            | $x, -1+y, z$           | 2.47 |
| C29-H29→O2  | /                            | $1-x, -y, 1-z$         | 2.53 |
| C33-H33→O1  | /                            | $-1+x, y, z$           | 2.60 |
| C40-H40→O4  | /                            | $1-x, 1-y, 1-z$        | 2.45 |
| C47-H47C→F3 | /                            | $1-x, 1-y, -z$         | 2.51 |

8
